# 1 Combining SIMS and mechanistic 2 modelling to reveal nutrient kinetics in an 3 algal-bacterial mutualism

4 **Authors:** Hannah Laeverenz Schlogelhofer [1], François J. Peaudecerf [2], Freddy Bunbury [3], Martin  
5 J. Whitehouse [4], Rachel A. Foster [5], Alison G. Smith [3] and Ottavio A. Croze [1]

6

7 **Affiliations:** [1] Cavendish Laboratory, University of Cambridge, United Kingdom; [2] Institute of  
8 Environmental Engineering, Department of Civil, Environmental and Geomatic Engineering, ETH  
9 Zürich, Switzerland; [3] Department of Plant Sciences, University of Cambridge, United Kingdom; [4]  
10 Swedish Museum of Natural History, Stockholm, Sweden; [5] Department of Ecology, Environment  
11 and Plant Sciences, Stockholm University, Sweden

12

13 **Corresponding authors:**

14 Hannah Laeverenz Schlogelhofer; Tel.: +44(0)7940008330; Email: hl380@alumni.cam.ac.uk; Address:  
15 Cavendish Laboratory, J. J. Thomson Avenue, Cambridge, CB3 0HE, United Kingdom.

16 Ottavio A. Croze; Tel.: + 44(0)1223337357; Email: oac24@cam.ac.uk; Address: Cavendish Laboratory,  
17 J. J. Thomson Avenue, Cambridge, CB3 0HE, United Kingdom.

## 18 **Abstract**

19 Microbial communities are of considerable significance for biogeochemical processes, for the health  
20 of both animals and plants, and for biotechnological purposes. A key feature of the interactions  
21 between microbes is the exchange of nutrients between cells. Isotope labelling followed by analysis  
22 with secondary ion mass spectrometry (SIMS) can identify nutrient fluxes and heterogeneity of  
23 substrate utilisation on a single cell level. Here we present a novel approach that combines SIMS  
24 with a mechanistic model to reveal otherwise inaccessible nutrient kinetics. The method is applied  
25 to study the onset of a synthetic mutualistic partnership between a vitamin B<sub>12</sub>-dependent mutant  
26 of the alga *Chlamydomonas reinhardtii* and the B<sub>12</sub>-producing, heterotrophic bacterium  
27 *Mesorhizobium loti*, which is supported by algal photosynthesis. Results show that an initial pool of  
28 fixed carbon delays the onset of mutualistic cross-feeding, and the model allows quantification of  
29 this delay. Our method is widely applicable to other microbial systems, and will contribute to  
30 furthering a mechanistic understanding of microbial interactions.

## 31 **Introduction**

32 Microbial communities underpin many globally important processes, from biogeochemical cycles (1)  
33 and the ecology of aquatic (2,3) and terrestrial food webs (4,5), to wastewater treatment (6,7) and  
34 the health of agricultural soils (8). A key feature of the interactions within these communities is the  
35 exchange of metabolites between species (9). In aquatic environments, photosynthetic carbon  
36 fixation by phytoplankton supports higher trophic levels, but also provides an important carbon  
37 source for heterotrophic bacteria (10–12). Conversely, bacteria have been shown to provide limiting  
38 nutrients to algae, including nitrates, phosphates and iron (13), vitamins (14,15) and carbon dioxide  
39 (16). Depending on environmental conditions, these metabolite exchanges control the outcome of  
40 microbial interactions, from parasitic, through commensal, to mutualistic (17–19).

41 To exploit microbial communities for biotechnological applications, it is crucial to be able to  
42 predict and control microbial interactions. Extensive studies of natural microbial communities using

43 metagenomics, metatranscriptomics and metaproteomics have provided considerable insight into  
44 potential metabolite exchanges (20,21). However, to obtain a fully predictive, mechanistic  
45 understanding of microbial interactions it is also essential to use bottom-up approaches employing  
46 laboratory model systems and mathematical models (22–25). For example, the comparison of a  
47 nutrient-implicit Lotka-Volterra model with experiments studying co-cultures of genetically  
48 engineered strains of yeast that each provide a different essential nutrient to the other  
49 demonstrated a limiting nutrient-induced shift from mutualism via parasitism to competition (26).  
50 Moreover, studies of engineered yeast communities combining agar pad experiments and models  
51 incorporating nutrient diffusion revealed that cross-feeding interactions influence genetic drift  
52 during spatial expansion (27), and that spatial self-organisation favours cooperation over cheating  
53 (28).

54         The exact metabolic interactions within microbial communities are often unknown.  
55 Secondary ion mass spectrometry (SIMS, NanoSIMS), an imaging mass spectrometry technique  
56 capable of analysing single microbial cells, reviewed in (29–33), has been instrumental in identifying  
57 new symbioses and microbial interactions for both cultured and non-cultured associations (34–37).  
58 Moreover, the metabolic activity and phylogenetic identity (16S rRNA) of single cells can be linked by  
59 combining *in situ* hybridization methods with SIMS (38,39). Using SIMS and NanoSIMS to visualise  
60 and quantify substrate utilisation in single cells, filaments, and colonies of microbial cells has helped  
61 to determine the heterogeneity of single cell metabolic activity (38,40), sub-cellular location of  
62 assimilated substrates (41,42), nutrient exchanges between symbiotic partners (35,36) and the  
63 effect of physical attachment on carbon and nitrogen fluxes between bacteria and microalgae  
64 (43,44).

65         In these studies, SIMS was primarily used to visualise and measure nutrient assimilation and  
66 transfer. In the dilute aquatic environment, microbial interactions will involve dynamic nutrient  
67 exchanges, particularly at the onset of association, when metabolite fluxes may be quite different  
68 from those arising during a stable, long-term interaction. Here we explore the establishment of

69 mutualistic interactions with a well-characterised model system: a co-culture of the cobalamin  
70 (vitamin B<sub>12</sub>) dependent, photosynthetic alga *Chlamydomonas reinhardtii metE7* strain (45) and the  
71 B<sub>12</sub>-producing, heterotrophic bacterium *Mesorhizobium loti*. Previous studies of this system, and a  
72 closely related one comprising the naturally B<sub>12</sub>-dependent alga *Lobomonas rostrata*, have  
73 demonstrated mutualistic growth dynamics predicated on the exchange of vitamin B<sub>12</sub> and organic  
74 carbon photosynthate (45,46). The relative proportions of the two organisms are stably maintained  
75 over hundreds of generations, but can be perturbed by supplementation with cobalamin or an  
76 organic carbon source like glycerol (46). The effect of environment geometry on the mutualistic  
77 dynamics of spatially separated populations was also recently modelled mathematically, and realised  
78 experimentally (47). Here, SIMS experiments that follow the temporal variation in <sup>13</sup>C labelling are  
79 combined with a mechanistic, nutrient-explicit model to gain further insight into how these  
80 organisms interact. The model permits use of the SIMS data to obtain nutrient exchange kinetics,  
81 which were not possible to measure experimentally, and to explore potential mechanisms for the  
82 observed single cell heterogeneity.

## 83 **Materials and Methods**

### 84 *Algal and bacterial strains*

85 The B<sub>12</sub>-dependent alga used in this work was *C. reinhardtii metE7* (ref. 45). The B<sub>12</sub>-producing  
86 bacterium used was *M. loti* (MAFF 303099), originally a gift from Prof Allan Downie, John Innes  
87 Centre, UK.

### 88 *Growth conditions*

89 All cultures were grown in a 12 h – 12 h light-dark cycle at 25°C, shaking at 120 rpm. The light  
90 intensity of the photosynthetically active radiation was approximately 70 μmol m<sup>-2</sup> s<sup>-1</sup>, measured  
91 using a Skye PAR sensor (SKP 215). Tris-minimal medium was used for all cultures, meaning that *C.*  
92 *reinhardtii metE7* grew phototrophically in our experiments. Tris-minimal medium is based on TAP

93 (48) but omits the acetic acid and *HCl* is used to titrate to *pH* 7 (ref. 49). The trace elements  
94 solutions used (Supplementary Table S1) were adapted from (50) to include a seventh solution  
95 containing cobalt, since cobalt is required as the central ion of vitamin B<sub>12</sub>. The cobalt concentration  
96 was chosen to be the same as in Hutner's trace elements (51). Cyanocobalamin (referred to as B<sub>12</sub>  
97 throughout this work), glycerol and sodium bicarbonate were added to the medium as required  
98 (Supplementary Table S2).

99 Dissolved sodium <sup>13</sup>C-bicarbonate (Sigma-Aldrich *NaH*<sup>13</sup>*CO*<sub>3</sub>, 98 atm% <sup>13</sup>C) was used for  
100 the stable isotope labelling of microbial cultures (the work-flow is illustrated in Supplementary  
101 Figure S1). A sample taken from the 600 mL axenic pre-culture of algae was washed and then re-  
102 suspended in 1 L of fresh media containing 100 ng L<sup>-1</sup> B<sub>12</sub> and 5 mM *NaH*<sup>13</sup>*CO*<sub>3</sub>. This pre-labelling  
103 culture of algae was grown for 48 h (see Supplementary Information for the experimental and  
104 model results for this culture). An axenic pre-culture of bacteria was grown in media with  
105 0.1 % (*v/v*) glycerol, which was then sampled, washed and re-suspended in 750 mL fresh media  
106 containing 5 mM *NaH*<sup>13</sup>*CO*<sub>3</sub>, to which 250 mL of pre-labelled algae was added to initiate the co-  
107 culture. Cultures of axenic bacteria were grown with 5 mM *NaH*<sup>13</sup>*CO*<sub>3</sub> and different concentrations  
108 of unlabelled glycerol.

### 109 *Population growth*

110 Population growth was monitored using viable counts. A series of 10-fold dilutions were performed  
111 and aliquots of 20 μL from relevant dilutions (i.e. chosen such that approximately 10 to 100  
112 colonies would result after plating) were spotted onto TY agar plates. The plates were tilted back  
113 and forth to disperse the cells and make the colonies easier to distinguish (52). Plates were  
114 incubated in continuous light at 25°C for approximately 5 days and in the dark at 30°C for  
115 approximately 2 days, for algal and bacterial colonies respectively. Two independent viable counts  
116 were obtained for each time-point and the results converted to values for the population size in  
117 units of colony forming units per unit volume (*cfu mL*<sup>-1</sup>).

## 118 *Isotope Ratio Mass Spectrometry*

119 Isotope Ratio Mass Spectrometry (IRMS) was used to measure  $^{13}\text{C}$  ratios for bulk samples of algal  
120 and bacterial biomass. IRMS also measured the total carbon and nitrogen content, which was used  
121 to calculate the C:N ratio and, together with dry mass and cell density measurements, to estimate  
122 the carbon yield (i.e.  $\text{cells molC}^{-1}$ ) for algae and bacteria, see Table S4 and Supplementary  
123 Information for details.

## 124 *Secondary Ion Mass Spectrometry*

### 125 *Sample preparation*

126 Below is a brief outline of the SIMS sample preparation procedure, full details are in Supplementary  
127 Information. Samples were chemically fixed using formaldehyde. Vacuum filtration was used to  
128 deposit the cells onto 0.22  $\mu\text{m}$  pore size membrane filters with a  $\approx 20 \text{ nm}$  gold coating, with nucleic  
129 acid staining and confocal microscopy (Olympus Fluoview FV1200) used to confirm an even  
130 distribution of cells on the filter. A single hole punch was used to cut out 4 – 6  $\text{mm}$  disks from the  
131 filter samples. Following this, a Zeiss laser micro-dissection microscope (Zeiss LSM710-NLO housed  
132 at the LCI facility of the Karolinska Institute, Stockholm) was used to image the autofluorescence of  
133 the algal chlorophyll and create laser marks on the samples, used to locate areas of interest with the  
134 camera of the SIMS instrument. Lastly, the samples were placed on conductive sticky tape, mounted  
135 onto a glass disk and sputter coated with gold.

### 136 *SIMS analysis*

137 SIMS analysis was performed using the Cameca IMS 1280 at the NordSIM facility in the Department  
138 of Geosciences at the Swedish Museum of Natural History in Stockholm. The instrument uses a  
139 Gaussian focussed primary ion beam of caesium ions ( $\text{Cs}^+$ ). For selected positions on the filter  
140 sample,  $45 \times 45 \mu\text{m}$  square areas were pre-sputtered for 10 s with a 3  $\text{nA}$  primary ion beam.  
141 Within this pre-sputtered region, 100 scans of a  $35 \times 35 \mu\text{m}$  square area were measured using a  $\approx$   
142 60 – 80  $\text{pA}$  primary ion beam (spot size of approximately 1  $\mu\text{m}$ ). The secondary ion mass peaks

143 were measured using an ion counting electron multiplier in peak hopping mode with a 44 ns  
144 electronically gated dead-time. The count times for the  $^{12}\text{C}^{14}\text{N}^-$ ,  $^{12}\text{C}^{15}\text{N}^-$  (not used in subsequent  
145 analysis) and  $^{13}\text{C}^{14}\text{N}^-$  secondary ion peaks were 1, 0.5 and 2 s respectively. A mass resolution  
146 ( $M/\Delta M$ ) of approximately 6000 for the preliminary experiments (see Figure S10) and 7000 for the  
147 final experiments was used; a mass resolution of 6000 – 7000 was sufficient in resolving both the  
148  $^{12}\text{C}^{14}\text{N}^-$  and  $^{13}\text{C}^{14}\text{N}^-$  peaks. Interference of  $^{11}\text{B}^{16}\text{O}^-$  with the  $^{13}\text{C}^{14}\text{N}^-$  peak at mass 27 was not  
149 an issue because no boron or boron containing compounds were used in the culture media. The  
150 SIMS measurements were run once for bacterial cells and repeated 1 – 8 times for each algal cell.  
151 The WinImage2 software (Cameca) was used to obtain the isotope ratio  $R = ^{13}\text{C}/^{12}\text{C}$  for single cells  
152 of algae and bacteria (see Supplementary Information for details). The atomic fraction of  $^{13}\text{C}$ , i.e.  
153  $f = ^{13}\text{C}/(^{13}\text{C} + ^{12}\text{C})$ , was calculated using

$$154 \quad f = \frac{R}{1+R}. \quad (1)$$

155 Several technical considerations were taken into account (full details in Supplementary  
156 Information and Figure S2). First, a depth analysis was performed by taking repeated measurements  
157 of the same cells, which demonstrated that a single measurement was sufficiently representative for  
158 bacteria, whereas for algal cells the mean of three repeated measurements was used to obtain a  
159 representative measurement. Second, a scattering effect associated with highly labelled algae was  
160 observed, therefore for the analysis described in this work only bacteria from scan areas not  
161 containing labelled algae were included. Lastly, the dilution effect, due to chemical fixation and  
162 nucleic acid staining introducing unlabelled carbon into cells, was taken into consideration (see Table  
163 S3). To estimate the undiluted atomic fraction of  $^{13}\text{C}$ , SIMS results were *dilution-corrected* using the  
164 method established in (53).

### 165 *Mechanistic model*

166 To better understand the carbon kinetics revealed by the co-culture experiments and the underlying  
167 mutualistic microbial dynamics, a mechanistic model was formulated. A brief overview is provided

168 here with full details given in Supplementary Information. The model captures essential nutrient  
 169 exchanges between algae and bacteria, shown schematically in Figure 1. Algal growth is dependent  
 170 on the external B<sub>12</sub> concentration  $v$ , originating from bacterial production. The growth of bacteria, in  
 171 turn, depends on the external concentration of algal-derived DOC, modelled as an effective single  
 172 carbon source  $c_o$ . This exchange of B<sub>12</sub> and DOC provides mutualistic coupling between the two  
 173 species. The co-culture is assumed to be well-mixed, such that

$$174 \quad \frac{da}{dt} = \mu_a a \left(1 - \frac{a}{K_a}\right) \left(\frac{v}{K_v + v}\right) \quad \text{and} \quad \frac{db}{dt} = \mu_b b \left(1 - \frac{b}{K_b}\right) \left(\frac{c_o}{K_c + c_o}\right), \quad (2)$$

175 with  $a$  and  $b$  the algal and bacterial cell densities respectively,  $\mu_a$  and  $\mu_b$  the maximum growth  
 176 rates,  $K_a$  and  $K_b$  the carrying capacities, and  $K_v$  and  $K_c$  the half-saturation concentrations. Although  
 177 DIC is assumed to be non-limiting (as in the experiments), accounting for DIC kinetics was essential  
 178 to connect the model to SIMS experiments, where isotope labelling relied on assimilation of <sup>13</sup>C via  
 179 DIC. As any living cell, heterotrophic bacteria can assimilate inorganic carbon through carboxylation  
 180 reactions (54,55). The model incorporates this observation through a DIC uptake parameter defined  
 181 as  $X = r_u^{DIC}/r_u$ , where  $r_u^{DIC}$  is the DIC uptake rate and  $r_u$  the total carbon uptake rate. Bacterial  
 182 respiration further contributes to the inorganic carbon kinetics (56). This is modelled through the  
 183 maximum bacterial growth efficiency  $\eta$ , which quantifies how respiration affects carbon uptake in  
 184 the exponential growth phase. For  $\eta \rightarrow 1$ , respiration goes to zero and does not affect carbon  
 185 uptake. Instead, with  $\eta \rightarrow 0$  respiration rate is high compared to growth rate and thus strongly  
 186 affects the carbon kinetics. Further, the model minimally describes photosynthesis and carbon  
 187 storage in algae by splitting algal carbon biomass into two internal components, *photosynthetically-*  
 188 *active* carbon  $c_{a,p}$ , available for exudation, and *stored* carbon  $c_{a,s}$ , used for biomass growth, in  
 189 storage compounds (e.g. starch) and for cellular maintenance. Thus, the model effectively describes  
 190 DOC exudation as originating from excess algal photosynthesis. The vitamin, DOC and DIC  
 191 concentrations in the model are governed by the rate laws

$$192 \quad \frac{dv}{dt} = p_v b - r_v, \quad \frac{dc_o}{dt} = r_e - (1 - X)r_u \quad \text{and} \quad \frac{dc_i}{dt} = r_r - X r_u - r_p \quad (3)$$



193 respectively, where we assume a constant B<sub>12</sub> production rate per bacterial cell  $p_v$ ,  $r_v$  is the total  
194 vitamin uptake rate by algae,  $r_e$  the total DOC exudation rate by algae,  $r_u$  the total carbon uptake  
195 rate by bacteria,  $r_r$  the total bacterial respiration rate and  $r_p$  the total photosynthetic carbon  
196 assimilation rate by algae. The DOC exudation rate from algae is given by  $r_e = (1 - \phi_s) p_c a$ , where  
197  $p_c$  determines the DOC production rate per algal cell (assumed constant), and  $\phi_s$  defines the  
198 fraction of carbon stored by algae, i.e.  $\phi_s = c_{a,s}/(c_{a,s} + c_{a,p})$ . Combining the differential equations  
199 for the carbon concentrations and the definition of atomic fraction  $f = {}^{13}\text{C}/({}^{13}\text{C} + {}^{12}\text{C})$ , we can  
200 write down differential equations for the dynamics of the atomic fractions, observed experimentally  
201 using SIMS. As an example, the atomic fraction for bacteria is given by

$$202 \quad \frac{df_b}{dt} = (X f_i + (1 - X) f_o - f_b) \frac{\mu_b}{\eta} \left( \frac{c_o}{K_c + c_o} \right), \quad (4)$$

203 with  $f_b$ ,  $f_i$  and  $f_o$  the atomic fractions of  ${}^{13}\text{C}$  for bacteria, DIC and DOC respectively, and all other  
204 parameters as previously defined.

## 205 Results

### 206 *Inorganic carbon acquisition by axenic bacteria*

207 Axenic cultures of the rhizobial bacterium *M. loti* provided a benchmark for applying our method to  
208 the co-culture and allowed quantification of bacterial inorganic carbon acquisition. *M. loti* was  
209 grown axenically for 72 h with 5 mM NaH<sup>13</sup>CO<sub>3</sub> (the labelled DIC source) and different  
210 concentrations of unlabelled glycerol, providing a source of organic carbon. SIMS images (Figure 2A)  
211 were used to determine the atomic fraction of  ${}^{13}\text{C}$ ,  $f$ , for individual bacterial cells. The quantity  $f_b$   
212 (Figure 2B) represents the fraction of  ${}^{13}\text{C}$  averaged over a distribution of single cell measurements;  
213 single cell heterogeneity effects are discussed below.

214 Concomitantly to SIMS, bacterial abundance was quantified using viable counts. As  
215 expected, higher glycerol concentrations resulted in faster exponential growth and larger carrying  
216 capacities (Figure 2C). Even with no glycerol added to the growth medium, bacterial growth was still

217 observed (see also Figure S7). This was likely due to internal stored carbon carried forward from the  
218 pre-culture. During the first 24 h, when all cultures analysed were in the exponential growth phase,  
219 greater  $^{13}\text{C}$ -enrichment was observed for bacteria grown with a higher concentration of glycerol  
220 (Figure 2B). Since only inorganic carbon was labelled, the increase in  $f_b$  demonstrates DIC acquisition  
221 by *M. loti*.

222 The co-culture model was applied to interpret the SIMS results for the axenic cultures of *M.*  
223 *loti*. Mathematically, the model used for axenic bacteria is given by equations (2), (3) and (4) in  
224 Materials and Methods, with  $a = v = r_e = r_p = 0$ , which describes logistic growth of a bacterial  
225 population growing on a limiting organic carbon source.

226 To fit the model to the SIMS and growth data, two global fits were performed, one including  
227 respiration and another ignoring it. In the latter case, the model was unable to reproduce the data  
228 well (dotted line in Figure 2B-C). This suggests that DIC uptake and respiration are essential to  
229 accurately describe the carbon kinetics of axenic bacteria. The bacteria grown with 0.1 % glycerol  
230 showed a prominent peak in  $f_b$ , which the model without respiration was unable to reproduce  
231 (Figure 2B). This can be explained by considering that only respiration provides the feedback of  
232 unlabelled carbon necessary for  $f_b$  to decrease. Respiration converts glycerol to  $\text{CO}_2$ , which is  
233 released into solution and lowers the total labelled fraction of DIC. Thus, the labelled fraction of  
234 carbon consumed by bacteria decreases, causing  $f_b$  to decrease. The fit results for the growth  
235 efficiency  $\eta \in [0.15 - 0.63]$  and DIC uptake parameter  $X \in [0.009 - 0.046]$  (Supplementary Table  
236 S7) are similar to those reported in the literature, e.g.  $\eta \in [0.05 - 0.6]$  (ref. 57) and  $X \in$   
237  $[0.014 - 0.065]$  (ref. 54). Moreover, the DIC uptake parameter  $X$  was found to increase as a  
238 function of the exponential growth rate  $\mu_B$ , according to  $X = m \ln(\mu_B) + n$  with  $m = 0.0167 \pm$   
239  $0.0004$ ,  $n = 0.0785 \pm 0.0013$  and  $R^2 = 0.999$ . A negative correlation between the growth  
240 efficiency  $\eta$  and  $\ln(\mu_B)$  was found, giving  $\eta = p \ln(\mu_B) + q$  with  $p = -0.10 \pm 0.12$ ,  $q = 0.12 \pm$   
241  $0.36$  and  $R^2 = 0.282$ ; see Supplementary Table S7 and Supplementary Figure S8. The increase in the  
242 DIC uptake parameter  $X$  can be reasonably associated with an increase in carboxylation reactions

243 responsible for DIC acquisition with faster growth (54,55), however a more detailed metabolic model  
244 would be required to further investigate the functional relationships emerging from our data.  
245 Overall, this study of axenic cultures revealed how the combination of temporal SIMS measurements  
246 with modelling can help determine which key metabolic phenomena are responsible for observed  
247 isotope labelling dynamics.

### 248 *Carbon transfer from algae to bacteria in co-culture*

249 To gain new insights into the establishment of mutualistic algal-bacterial interactions, we applied the  
250 combined SIMS-modelling approach to study a co-culture between *C. reinhardtii metE7* and *M. loti*.  
251 The algae were pre-labelled and not washed prior to co-culture inoculation (see Materials and  
252 Methods and Figure S9), therefore DOC from the pre-culture was carried over into the co-culture.  
253 This provided the best chance of observing bacterial assimilation of algal derived carbon, given that  
254 the time-scale for DOC to become available to bacteria in the co-culture had not been measured  
255 previously.

256 The labelled carbon kinetics in the co-culture were followed using SIMS over a period of  
257 72 h. SIMS images (Figure 3A) were used to determine the atomic fraction of  $^{13}\text{C}$ ,  $f$ , for individual  
258 bacterial and algal cells. As for axenic bacteria, the quantities  $f_a$  and  $f_b$  denote the average atomic  
259 fractions for a population of algae and bacteria respectively (Figure 3B); single cell heterogeneity is  
260 considered below. Sustained population growth was observed for both the algal and bacterial  
261 populations (Figure 3C), which implied that they were not nutrient limited. In spite of algal  
262 population growth,  $f_a$  remained approximately constant throughout the co-culture (Figure 3B),  
263 which indicates a likely equilibrium for  $^{13}\text{C}$  in algae, with  $f_a$  equal to the atomic fraction of DIC  $f_i$   
264 (see equation (S30) in Supplementary Methods). The increase in  $f_b$  (Figure 3B) showed that the  
265 bacteria assimilated  $^{13}\text{C}$  compounds from the extracellular environment. However, on its own, the  
266 SIMS results could not provide information on the precise carbon kinetics within the co-culture. In  
267 the early stages of a co-culture the question remains: are cells growing on mutually produced

268 nutrients, nutrients carried-over from pre-culture or internal stores? Combining SIMS data with our  
269 mechanistic model allowed this question to be addressed.

### 270 *Hidden nutrient kinetics*

271 To further analyse the SIMS data and explore possible nutrient kinetics that couple the interaction  
272 partners, we formulated a mechanistic model of the algal-bacterial co-culture (see Materials and  
273 Methods) and performed parameter optimisations (see Supplementary Information, Figure S5, S6  
274 and Tables S5 and S6). Figure 3B-C shows two separate global fits of the model to the algal and  
275 bacterial atomic fractions and cell densities. Fit 1 fixed the initial atomic fraction of  $^{13}\text{C}$  for DOC at  
276  $f_o(0) = 0.64$ , the expected value from the pre-labelled culture of algae (see Supplementary  
277 Information), whereas fit 2 included  $f_o(0)$  as a free parameter. Fit 2 may appear to better describe  
278 the data, because it better reproduces bacterial growth, but the parameter optimisation result for  
279  $f_o(0)$  in fit 2 was close to natural abundance (Supplementary Table S8), which is not realistic for a  
280 culture expected to contain some labelled DOC from the highly labelled algal pre-culture. Neither fit  
281 was thus able to quantitatively capture the observations, suggesting that our model is probably too  
282 simple to be fully quantitative. Nonetheless, the model fits the data well qualitatively, and could be  
283 used to explore the nutrient kinetics that are not directly inferable from our measurements.

284 Using parameters from fit 1 (Supplementary Table S6), the model revealed the potential  $\text{B}_{12}$   
285 and DOC kinetics driving the microbial growth dynamics (Figure 4A-B). The vitamin concentration  $v$   
286 increases from zero (the co-culture medium was assumed to be initially vitamin-free because  
287 bacteria were washed thoroughly prior to establishing the co-culture and  $\text{B}_{12}$  was assumed to have  
288 been fully depleted in the pre-labelling culture of algae because it was inoculated with only  
289  $100 \text{ ng L}^{-1} \text{ B}_{12}$ ), and then starts to decrease after about 40 h (Figure 4A). Conversely, the DOC  
290 concentration  $c_o$  drops from the initial concentration  $c_o(0)$ , carried over from the unwashed algal  
291 pre-culture, and then starts to rise after approximately 30 h (Figure 4B), a few hours before the  
292 turnaround in  $\text{B}_{12}$  concentration. These results can be interpreted in terms of the production and  
293 consumption of nutrients, and the resulting population growth. At the start of the experiment

294 bacterial DOC uptake during growth was likely responsible for the initial depletion of DOC (Figure  
295 4B), which occurred at a faster rate than could be replenished by the algae. The model results also  
296 suggest that growing bacteria were initially producing B<sub>12</sub> faster than the algal uptake rate, allowing  
297 the vitamin concentration to increase (Figure 4A). As it did so, the algae grew and photosynthesised,  
298 producing DOC to be utilised by the bacteria, which proliferated in turn. The turnaround in the  
299 nutrient kinetics occurs when production and consumption rates are matched, seen mathematically  
300 by setting  $\frac{dv}{dt} = 0 = \frac{dc_o}{dt}$  in equation (3). Figure 4A-B suggests that beyond the turning point at  $\approx$   
301 30 h, DOC became more abundant as production by algae out-paced bacterial consumption. A short  
302 time later, the concentration of B<sub>12</sub> began to decrease as production by bacteria fell below algal  
303 consumption.

304 Furthermore, the time evolution of the derivative of the bacterial atomic fraction  
305  $\frac{df_b}{dt}$  (obtainable from the model; equation (4)) is seen to mirror closely the fall and rise of the DOC,  
306 reproducing a turnaround at approximately the same time (Figure 4C). The model implies that this is  
307 because the rate of DOC uptake by bacteria is proportional to the DOC concentration, such that a  
308 decrease in the DOC concentration decreases the uptake rate, which directly slows down the rate of  
309 <sup>13</sup>C assimilation. Thus, the model, while not providing a fully quantitative description of the growth  
310 dynamics, is nevertheless able to chart the temporal variation of the nutrient kinetics from isotope  
311 labelling experiments.

### 312 *Single cell heterogeneity*

313 The SIMS results discussed thus far were averages obtained from several single cell measurements.  
314 We now turn to the heterogeneity in atomic fraction revealed by SIMS (see Supplementary Figures  
315 S3 and S4 for histograms of the single cell data). For this we concentrated on bacteria which  
316 provided better statistics than algae (minimum 80 bacterial cells measured per time point, versus  
317 5 – 29 cells per time-point for algae). For unlabelled bacteria at natural abundance the single cell  
318 measurements showed a narrow distribution of atomic fractions (Supplementary Figure S3),

319 indicating that all bacteria started at approximately the same value. For axenic bacteria, increasing  
320 the glycerol concentration caused greater DIC uptake, and  $^{13}\text{C}$  was seen to be more widely spread  
321 across the population (Supplementary Figure S3). For the highest glycerol concentration, the cell  
322 distribution was seen to broaden and then narrow again over time, corresponding to the rise and fall  
323 of the mean atomic fraction, and a transition of the culture to stationary phase. In contrast, for  
324 bacteria in co-culture, the distribution of single cell atomic fractions broadened steadily over time  
325 (Supplementary Figure S4).

326         These single cell results clearly indicate heterogeneity in isotope labelling across the  
327 bacterial populations. To analyse heterogeneity, a stochastic, structured model would strictly be  
328 required, for example as was used to explain how the circadian clock and environmental cycles  
329 affect cell size control and generate two subpopulations in the cyanobacterium *Synechococcus*  
330 *elongatus* (58). Our mean field model could, however, still be usefully applied to simulate  
331 heterogeneity and investigate potential origins of the observed single cell distributions by solving the  
332 model for parameter values above and below the fit results obtained for the mean atomic fractions  
333 (Supplementary Tables S6 and S7). Specifically, we considered the effect of varying the DIC uptake  
334 parameter  $X$ , bacterial maximum growth efficiency  $\eta$  and maximum bacterial growth rate  $\mu_b$ , with  
335 ranges given in the legend of Figure 5. The resulting variations in predicted bacterial atomic fractions  
336 (shaded areas in Figure 5) could then be compared with the variation observed experimentally,  
337 considered as the standard deviations of the SIMS single cell distributions (error bars in Figure 5). For  
338 axenic bacteria, a distribution in the values of  $X$  appeared to best account for the experimental  
339 standard deviation in the atomic fraction  $f_b$ , especially for the culture grown at the highest glycerol  
340 concentration, where the model successfully reproduced the experimentally observed narrowing of  
341 the distribution at long times (Figure 5A). The comparison with experimental trends for variations in  
342  $\eta$  and  $\mu_b$  was less favourable (Figure 5B-C). Instead, for bacteria in co-culture, the progressive  
343 broadening of the distribution of  $f_b$  was best described by a distribution in  $\mu_b$  (Figure 5C), with  
344 distributions in  $\eta$  and  $X$  not doing as well in the comparison (Figure 5A-B).

## 345 **Discussion**

346 Whilst several studies have demonstrated mutualistic interaction between bacteria and algae  
347 mediated by nutrient exchange (43,44,46), none have integrated time-resolved SIMS with  
348 mechanistic modelling to elucidate nutrient kinetics, as we have done here. Our findings examine  
349 how nutrient kinetics control the inception and temporal development of an algal-bacterial  
350 mutualism. More broadly, this connects to the question of how co-occurrence can, on an  
351 evolutionary timescale, transform non-specialised relationships into more specialised partnerships,  
352 from streamlined microbial metabolisms (59–62) to plant-microbe interactions (63–65).

353         Initially, our SIMS-modelling approach demonstrated the uptake of labelled DIC by the  
354 heterotrophic bacterium *M. loti*, grown axenically on an unlabelled carbon source (glycerol). This  
355 confirmed similar results from previous studies of DIC uptake by heterotrophic bacteria (54,55),  
356 while also providing more extensive data in terms of temporal dynamics and concentration of  
357 organic carbon. Fractional DIC uptake, described by the parameter  $X$ , and respiration, described by  
358 the bacterial growth efficiency parameter  $\eta$ , were essential for quantitatively describing the results.  
359 Fitting the model to results of  $^{13}\text{C}$  labelling experiments provided values for these parameters, an  
360 approach that could be used in future studies to investigate how these parameters are affected by  
361 environmental variables, including temperature, nutrient limitation and energetic quality of the  
362 organic carbon substrate (56,66).

363         The SIMS-modelling approach was then used to shed light on the role of nutrient exchange  
364 during the onset of mutualistic interaction in a co-culture of *M. loti* bacteria and vitamin B<sub>12</sub>-  
365 dependent *C. reinhardtii metE7* algae. SIMS results showed that the bacteria assimilated algal-  
366 derived labelled carbon and using our mechanistic model we further revealed nutrient kinetics that  
367 couple the mutualistic partners. Initial DOC in the co-culture (carried forward from the algal pre-  
368 culture) delayed the onset of reciprocal mutualistic interaction: algae and bacteria started to grow  
369 exclusively on what each partner was producing only after about 30 *h* into the co-culture. A similar

370 time-scale was observed in a NanoSIMS study of Antarctic microbial communities, which found that  
371 heterotrophic bacteria used organic carbon exudates from primary producers within 24 h (67).

372 Exploiting the single cell resolution of SIMS, our results revealed the heterogeneity of carbon  
373 uptake across a bacterial population. The distribution of atomic fractions for axenic bacteria  
374 displayed a width that was non-monotonic with time, whereas for the bacteria in co-culture with  
375 algae, this width increased monotonically. This difference in the temporal evolution of the standard  
376 deviation could be because DIC kinetics governed the isotope labelling in the axenic cultures, while  
377 the isotope labelling of co-cultured bacteria was likely dominated by uptake of algal derived DOC. To  
378 simulate variation of phenotypes across the bacterial population, our model was solved with  
379 parameter values above and below the fit results. A distribution in inorganic carbon uptake gave the  
380 best agreement with experiment for axenic cultures, whereas a distribution in bacterial growth rate  
381 best accounted for the co-culture measurements. This could well reflect the heterogeneous carbon  
382 environment for bacteria growing on algal exudates comprising a mix of compounds, each  
383 corresponding to a different growth rate. Conversely, axenic bacteria were fed on a single carbon  
384 substrate. Future studies could compare structured mechanistic models and computer simulations  
385 that describe variation in population dynamics and nutrient kinetics across microbial populations  
386 (58,68,69) with the approach to modelling heterogeneity used here.

387 Using a mechanistic model enhanced the interpretation of temporal nutrient kinetics data  
388 obtained using SIMS for an algal-bacterial co-culture. As discussed, the model we have constructed  
389 works well qualitatively, but comparison with the SIMS experiment points to possible improvements.  
390 For example, the model fit to SIMS data for the co-culture could benefit from better parametrisation  
391 of DOC production and its assimilation by bacteria. Further experiments that include DOC  
392 measurements would allow better estimates for the algal DOC export parameter  $s_c$  and the bacterial  
393 carbon uptake parameter  $k_{b,c}$  to be obtained. For the co-culture a discrepancy between bacterial  
394 growth and isotope labelling was observed, with estimates of net carbon assimilation rate from  
395 bacterial  $^{13}\text{C}$  enrichment measurements accounting for only about 6 % of bacterial population



396 growth (see Supplementary Information). This suggests that the pre-cultured bacteria were not  
397 completely carbon starved and could grow using internal stores of organic carbon. Future models  
398 could account for internal carbon storage in bacteria, e.g. using nutrient kinetic models informed by  
399 flux balance analysis. Despite these limitations, the current model could be used to qualitatively  
400 predict mutualistic dynamics, e.g. how different species or mutant combinations would grow or how  
401 different initial conditions affect the interaction outcome. This could guide experimental  
402 investigation and accelerate discovery towards a mechanistic understanding of microbial  
403 interactions.

## 404 **Acknowledgements**

405 H.L. acknowledges support from the EPSRC CDT in Nanoscience and Nanotechnology (NanoDTC),  
406 grant number EP/L015978/1. H.L. and O.A.C. gratefully acknowledge support from the Winton  
407 Programme for the Physics of Sustainability. O.A.C. and A.G.S. acknowledge EPSRC mobility  
408 fellowship EP/J004847/1. A.G.S. and F.B. acknowledge funding from BBSRC Doctoral Training  
409 Partnership BB/M011194/1. F.J.P. acknowledges support from Mines ParisTech and from a Raymond  
410 and Beverly Sackler Scholarship. We thank Howard Griffiths and Moritz Meyer for helpful  
411 discussions. We acknowledge James Rolfe and the Godwin Lab, Department of Earth Sciences,  
412 University of Cambridge for IRMS analysis. We acknowledge the KIVIK facility of Karolinska Institutet,  
413 and Andrea Caputo with assistance with the laser markings prior to SIMS. R.A.F. contribution,  
414 including the laser microscopy, was funded by an Academy Fellow Grant from the Knut and Alice  
415 Wallenberg Foundation. We thank Kerstin Lindén at the NordSIM facility at the Natural History  
416 Museum in Stockholm with assistance with sample preparation and SIMS analysis. The NordSIM  
417 facility acknowledges funding from the Swedish Museum of Natural History, Swedish Research  
418 Council (via infrastructure grant 2014-06375), University of Iceland and Consortium of Danish  
419 geoscience institutions.

## 420 **Author contributions**

421 HL, OC, AGS and RF conceived the study. HL performed the experiments and the modelling, collected  
422 data, analysed data and solved the model. FJP and FB contributed experiments to parameterise the  
423 model. FJP assisted with the optimisation. HL, OC and AGS wrote the manuscript, which was  
424 commented on by all authors.

## 425 **Compliance with ethical standards**

426 **Conflict of interest.** The authors declare that they have no conflict of interest.

427

## 428 **References**

- 429 1. Falkowski PG, Fenchel T, Delong EF. The Microbial Engines That Drive Earth's Biogeochemical  
430 Cycles. *Science*. 2008;320:1034–9.
- 431 2. Fenchel T. The microbial loop - 25 years later. *J Exp Mar Bio Ecol*. 2008;366:99–103.
- 432 3. Fuhrman JA, Cram JA, Needham DM. Marine microbial community dynamics and their  
433 ecological interpretation. *Nat Rev Microbiol*. 2015;13(3):133–46.
- 434 4. Van Der Heijden MGA, Bardgett RD, Van Straalen NM. The unseen majority: Soil microbes as  
435 drivers of plant diversity and productivity in terrestrial ecosystems. *Ecol Lett*. 2008;11(3):296–  
436 310.
- 437 5. Philippot L, Raaijmakers JM, Lemanceau P, Van Der Putten WH. Going back to the roots: The  
438 microbial ecology of the rhizosphere. *Nat Rev Microbiol*. 2013;11(11):789–99.
- 439 6. Kesaano M, Sims RC. Algal biofilm based technology for wastewater treatment. *Algal Res*.  
440 2014;5:231–40.
- 441 7. Cydzik-Kwiatkowska A, Zielińska M. Bacterial communities in full-scale wastewater treatment  
442 systems. *World J Microbiol Biotechnol*. 2016;32(4):1–8.
- 443 8. Bender SF, Wagg C, van der Heijden MGA. An Underground Revolution: Biodiversity and Soil

- 444 Ecological Engineering for Agricultural Sustainability. *Trends Ecol Evol.* 2016;31(6):440–52.
- 445 9. Phelan V V, Liu W-T, Pogliano K, Dorrestein PC. Microbial metabolic exchange--the  
446 chemotype-to-phenotype link. *Nat Chem Biol.* 2012;8(1):26–35.
- 447 10. Hellebust JA. Excretion of some organic compounds by marine phytoplankton. *Limnol*  
448 *Oceanogr.* 1958;10(2):192–206.
- 449 11. Cole JJ. Interactions Between Bacteria and Algae in Aquatic Ecosystems. *Annu Rev Ecol Syst.*  
450 1982;13(1):291–314.
- 451 12. Buchan A, LeCleir GR, Gulvik CA, González JM. Master recyclers: features and functions of  
452 bacteria associated with phytoplankton blooms. *Nat Rev Microbiol.* 2014;12(10):686–98.
- 453 13. Amin SA, Parker MS, Armbrust EV. Interactions between diatoms and bacteria. *Microbiol Mol*  
454 *Biol Rev.* 2012;76(3):667–84.
- 455 14. Croft MT, Lawrence AD, Raux-Deery E, Warren MJ, Smith AG. Algae acquire vitamin B12  
456 through a symbiotic relationship with bacteria. *Nature.* 2005;438(7064):90–3.
- 457 15. Bertrand EM, McCrow JP, Moustafa A, Zheng H, McQuaid JB, Delmont TO, et al.  
458 Phytoplankton-bacterial interactions mediate micronutrient colimitation at the coastal  
459 Antarctic sea ice edge. *Proc Natl Acad Sci U S A.* 2015;112(32):9938–43.
- 460 16. Bai X, Lant P, Pratt S. The contribution of bacteria to algal growth by carbon cycling.  
461 *Biotechnol Bioeng.* 2015;112(4):688–95.
- 462 17. Gurung TB, Urabe J, Nakanishi M. Regulation of the relationship between phytoplankton  
463 *Scenedesmus acutus* and heterotrophic bacteria by the balance of light and nutrients. *Aquat*  
464 *Microb Ecol.* 1999;17(1):27–35.
- 465 18. Liu H, Zhou Y, Xiao W, Ji L, Cao X, Song C. Shifting nutrient-mediated interactions between  
466 algae and bacteria in a microcosm: Evidence from alkaline phosphatase assay. *Microbiol Res.*  
467 2012;167(5):292–8.
- 468 19. Faust K, Raes J. Microbial interactions: from networks to models. *Nat Rev Microbiol.*  
469 2012;10(8):538–50.

- 470 20. Jansson JK, Neufeld JD, Moran MA, Gilbert JA. Omics for understanding microbial functional  
471 dynamics. *Environ Microbiol.* 2012;14:1–3.
- 472 21. Cooper MB, Smith AG. Exploring mutualistic interactions between microalgae and bacteria in  
473 the omics age. *Curr Opin Plant Biol.* 2015;26:147–153.
- 474 22. Momeni B, Chen C-C, Hillesland KL, Waite A, Shou W. Using artificial systems to explore the  
475 ecology and evolution of symbioses. *Cell Mol Life Sci.* 2011;68(8):1353–68.
- 476 23. Widder S, Allen RJ, Pfeiffer T, Curtis TP, Wiuf C, Sloan WT, et al. Challenges in microbial  
477 ecology: building predictive understanding of community function and dynamics. *ISME J.*  
478 2016;1–12.
- 479 24. Abreu NA, Taga ME. Decoding molecular interactions in microbial communities. *FEMS*  
480 *Microbiol Rev.* 2016;40:648–63.
- 481 25. Momeni B, Xie L, Shou W. Lotka-Volterra pairwise modeling fails to capture diverse pairwise  
482 microbial interactions. *Elife.* 2017;6:1–34.
- 483 26. Hoek TA, Axelrod K, Biancalani T, Yurtsev EA, Liu J, Gore J. Resource Availability Modulates  
484 the Cooperative and Competitive Nature of a Microbial Cross-Feeding Mutualism. *PLoS Biol.*  
485 2016;14(8):1–17.
- 486 27. Mueller MJI, Neugeboren BI, Nelson DR, Murray AW. Genetic drift opposes mutualism during  
487 spatial population expansion. *Proc Natl Acad Sci.* 2014;111(3):1037–42.
- 488 28. Momeni B, Waite AJ, Shou W. Spatial self-organization favors heterotypic cooperation over  
489 cheating. *Elife.* 2013;2:e00960.
- 490 29. Boxer SG, Kraft ML, Weber PK. Advances in imaging secondary ion mass spectrometry for  
491 biological samples. *Annu Rev Biophys.* 2009;38:53–74.
- 492 30. Wagner M. Single-Cell Ecophysiology of Microbes as Revealed by Raman Microspectroscopy  
493 or Secondary Ion Mass Spectrometry Imaging. *Annu Rev Microbiol.* 2009;63(1):411–29.
- 494 31. Musat N, Foster R, Vagner T, Adam B, Kuypers MMM. Detecting metabolic activities in single  
495 cells, with emphasis on nanoSIMS. *FEMS Microbiol Rev.* 2012;36(2):486–511.

- 496 32. Gao D, Huang X, Tao Y. A critical review of NanoSIMS in analysis of microbial metabolic  
497 activities at single-cell level. *Crit Rev Biotechnol.* 2015;36(5):884–90.
- 498 33. Musat N, Musat F, Weber PK, Pett-Ridge J. Tracking microbial interactions with NanoSIMS.  
499 *Curr Opin Biotechnol.* 2016;41:114–21.
- 500 34. Lechene CP, Luyten Y, McMahon G, Distel DL. Quantitative Imaging of Nitrogen Fixation by  
501 Individual Bacteria Within Animal Cells. *Science.* 2007;317:1563–6.
- 502 35. Foster RA, Kuypers MMM, Vagner T, Paerl RW, Musat N, Zehr JP. Nitrogen fixation and  
503 transfer in open ocean diatom–cyanobacterial symbioses. *ISME J.* 2011;5(9):1484–93.
- 504 36. Thompson AW, Foster RA, Krupke A, Carter BJ, Musat N, Vaultot D, et al. Unicellular  
505 Cyanobacterium Symbiotic with a Single-Celled Eukaryotic Alga. *Science.*  
506 2012;337(6101):1546–50.
- 507 37. de-Bashan LE, Mayali X, Bebout BM, Weber PK, Detweiler AM, Hernandez J-P, et al.  
508 Establishment of stable synthetic mutualism without co-evolution between microalgae and  
509 bacteria demonstrated by mutual transfer of metabolites (NanoSIMS isotopic imaging) and  
510 persistent physical association (Fluorescent in situ hybridization). *Algal Res.* 2016;15:179–86.
- 511 38. Musat N, Halm H, Winterholler B, Hoppe P, Peduzzi S, Hillion F, et al. A single-cell view on the  
512 ecophysiology of anaerobic phototrophic bacteria. *Proc Natl Acad Sci U S A.*  
513 2008;105(46):17861–6.
- 514 39. Behrens S, Lösekann T, Pett-Ridge J, Weber PK, Ng WO, Stevenson BS, et al. Linking microbial  
515 phylogeny to metabolic activity at the single-cell level by using enhanced element labeling-  
516 catalyzed reporter deposition fluorescence in situ hybridization (EL-FISH) and NanoSIMS. *Appl*  
517 *Environ Microbiol.* 2008;74(10):3143–50.
- 518 40. Foster RA, Szejtzenszus S, Kuypers MMM. Measuring Carbon and N<sub>2</sub> Fixation in Field  
519 Populations of Colonial and Free-Living Unicellular Cyanobacteria Using Nanometer-Scale  
520 Secondary Ion Mass Spectrometry. *J Phycol.* 2013;516:502–16.
- 521 41. Raina JB, Clode P, Cheong S, Bougoure J, Kilburn MR, Reeder A, et al. Subcellular tracking

- 522 reveals the location of dimethylsulfoniopropionate in microalgae and visualises its uptake by  
523 marine bacteria. *Elife*. 2017;1–17.
- 524 42. Finzi-Hart JA, Pett-Ridge J, Weber PK, Popa R, Fallon SJ, Gunderson T, et al. Fixation and fate  
525 of C and N in the cyanobacterium *Trichodesmium* using nanometer-scale secondary ion mass  
526 spectrometry. *Proc Natl Acad Sci*. 2009;106(15):6345–50.
- 527 43. Samo TJ, Kimbrel JA, Nilson DJ, Pett-Ridge J, Weber PK, Mayali X. Attachment between  
528 heterotrophic bacteria and microalgae influences symbiotic microscale interactions. *Environ*  
529 *Microbiol*. 2018;20(12):4385–400.
- 530 44. Arandia-Gorostidi N, Weber PK, Alonso-Sáez L, Morán XAG, Mayali X. Elevated temperature  
531 increases carbon and nitrogen fluxes between phytoplankton and heterotrophic bacteria  
532 through physical attachment. *ISME J*. 2016;11(3):641.
- 533 45. Helliwell KE, Collins S, Kazamia E, Purton S, Wheeler GL, Smith AG. Fundamental shift in  
534 vitamin B12 eco-physiology of a model alga demonstrated by experimental evolution. *ISME J*.  
535 2015;9(6):1446–55.
- 536 46. Kazamia E, Czesnick H, Nguyen TT Van, Croft MT, Sherwood E, Sasso S, et al. Mutualistic  
537 interactions between vitamin B12-dependent algae and heterotrophic bacteria exhibit  
538 regulation. *Environ Microbiol*. 2012;14(6):1466–76.
- 539 47. Peaudecerf FJ, Bunbury F, Bhardwaj V, Bees MA, Smith AG, Goldstein RE, et al. Microbial  
540 mutualism at a distance: The role of geometry in diffusive exchanges. *Phys Rev E*.  
541 2018;97:022411.
- 542 48. Gorman DS, Levine RP. Cytochrome f and plastocyanin: their sequence in the photosynthetic  
543 electron transport chain of *Chlamydomonas reinhardtii*. *Proc Natl Acad Sci U S A*.  
544 1965;54(6):1665–9.
- 545 49. Harris EH. *The Chlamydomonas Sourcebook: Introduction to Chlamydomonas and Its*  
546 *Laboratory Use* (vol. 1). 2nd ed. Academic Press; 2009.
- 547 50. Kropat J, Hong-Hermesdorf A, Casero D, Ent P, Castruita M, Pellegrini M, et al. A revised

- 548 mineral nutrient supplement increases biomass and growth rate in *Chlamydomonas*  
549 *reinhardtii*. *Plant J.* 2011 Jun;66(5):770–80.
- 550 51. Hutner SH, Provasoli L, Schatz A, Haskins CP. Some Approaches to the Study of the Role of  
551 Metals in the Metabolism of Microorganisms. *Source Proc Am Philos Soc.* 1950;94(21):152–  
552 70.
- 553 52. Jett BD, Hatter KL, Huycke MM, Gilmore MS. Simplified agar plate method for quantifying  
554 viable bacteria. *Biotechniques.* 1997;23(4):648–50.
- 555 53. Musat N, Stryhanyuk H, Bombach P, Adrian L, Audinot JN, Richnow HH. The effect of FISH and  
556 CARD-FISH on the isotopic composition of <sup>13</sup>C- and <sup>15</sup>N-labeled *Pseudomonas putida* cells  
557 measured by nanoSIMS. *Syst Appl Microbiol.* 2014;37(4):267–76.
- 558 54. Roslev P, Larsen MB, Jørgensen D, Hesselsoe M. Use of heterotrophic CO<sub>2</sub> assimilation as a  
559 measure of metabolic activity in planktonic and sessile bacteria. *J Microbiol Methods.*  
560 2004;59(3):381–93.
- 561 55. Hesselsoe M, Nielsen JL, Roslev P, Nielsen PH. Isotope labeling and microautoradiography of  
562 active heterotrophic bacteria on the basis of assimilation of <sup>14</sup>CO<sub>2</sub>. *Appl Environ Microbiol.*  
563 2005;71(2):646–55.
- 564 56. Carlson C, del Giorgio P, Herndl G. Microbes and the Dissipation of Energy and Respiration:  
565 From Cells to Ecosystems. *Oceanography.* 2007;20(2):89–100.
- 566 57. del Giorgio PA, Cole JJ. Bacterial Growth Efficiency in Natural Aquatic Systems. *Annu Rev Ecol*  
567 *Syst.* 1998;29(1):503–41.
- 568 58. Martins BMC, Tooke AK, Thomas P, Locke JCW. Cell size control driven by the circadian clock  
569 and environment in cyanobacteria. *Proc Natl Acad Sci.* 2018;115(48):E11415–24.
- 570 59. Helliwell KE, Wheeler GL, Leptos KC, Goldstein RE, Smith AG. Insights into the Evolution of  
571 Vitamin B12 Auxotrophy from Sequenced Algal Genomes. *Mol Biol Evol.* 2011;28(10):2921–  
572 33.
- 573 60. Amin SA, Hmelo LR, van Tol HM, Durham BP, Carlson LT, Heal KR, et al. Interaction and

- 574 signalling between a cosmopolitan phytoplankton and associated bacteria. *Nature*.  
575 2015;522(7554):98–101.
- 576 61. Kazamia E, Helliwell KE, Purton S, Smith AG. How mutualisms arise in phytoplankton  
577 communities: building eco-evolutionary principles for aquatic microbes. *Ecol Lett*.  
578 2016;19(7):810–22.
- 579 62. West SA, Cooper GA. Division of labour in microorganisms: An evolutionary perspective. *Nat*  
580 *Rev Microbiol*. 2016;14(11):716–23.
- 581 63. Chisholm ST, Coaker G, Day B, Staskawicz BJ. Host-microbe interactions: Shaping the  
582 evolution of the plant immune response. *Cell*. 2006;124(4):803–14.
- 583 64. Hassan S, Mathesius U. The role of flavonoids in root-rhizosphere signalling: Opportunities  
584 and challenges for improving plant-microbe interactions. *J Exp Bot*. 2012;63(9):3429–44.
- 585 65. Daubech B, Remigi P, de Moura GD, Marchetti M, Pouzet CC, Auriac MC, et al. Spatio-  
586 temporal control of mutualism in legumes helps spread symbiotic nitrogen fixation. *Elife*.  
587 2017;6:1–21.
- 588 66. Hofmann R, Griebler C. DOM and bacterial growth efficiency in oligotrophic groundwater:  
589 Absence of priming and co-limitation by organic carbon and phosphorus. *Aquat Microb Ecol*.  
590 2018;81(1):55–71.
- 591 67. Smith HJ, Foster RA, McKnight DM, Lisle JT, Littmann S, Kuypers MMM, et al. Microbial  
592 formation of labile organic carbon in Antarctic glacial environments. *Nat Geosci*.  
593 2017;10(5):356.
- 594 68. McNair JN, Boraas ME, Seale DB. Size-structure dynamics of the rotifer chemostat: a simple  
595 physiologically structured model. *Hydrobiologia*. 1998;387:469–76.
- 596 69. Hellweger FL, Clegg RJ, Clark JR, Plugge CM, Kreft JU. Advancing microbial sciences by  
597 individual-based modelling. *Nat Rev Microbiol*. 2016;14(7):461–71.
- 598



599 **Figure Legends**

600

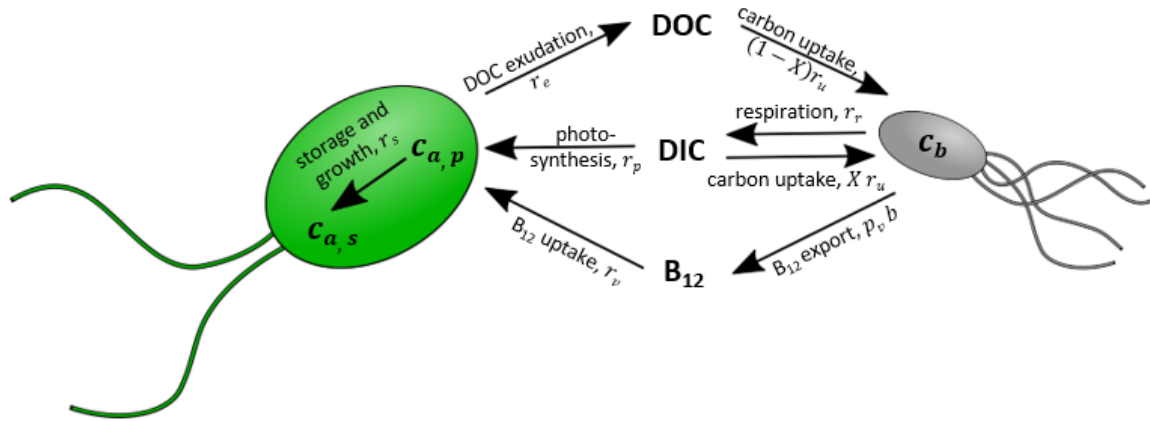

601

602 **Figure 1: Schematic to illustrate the nutrient kinetics included in the algal-bacterial co-culture**

603 **model.** Vitamin B<sub>12</sub> is released by bacteria and required for algal growth. Bacterial growth is

604 dependent on DOC produced by algae. Also considered are: algal photosynthesis, carbon storage,

605 and DOC exudation from excess photosynthesis; bacterial respiration and DIC uptake. An overview

606 of the model is given in Materials and Methods with full details provided in Supplementary

607 Information.

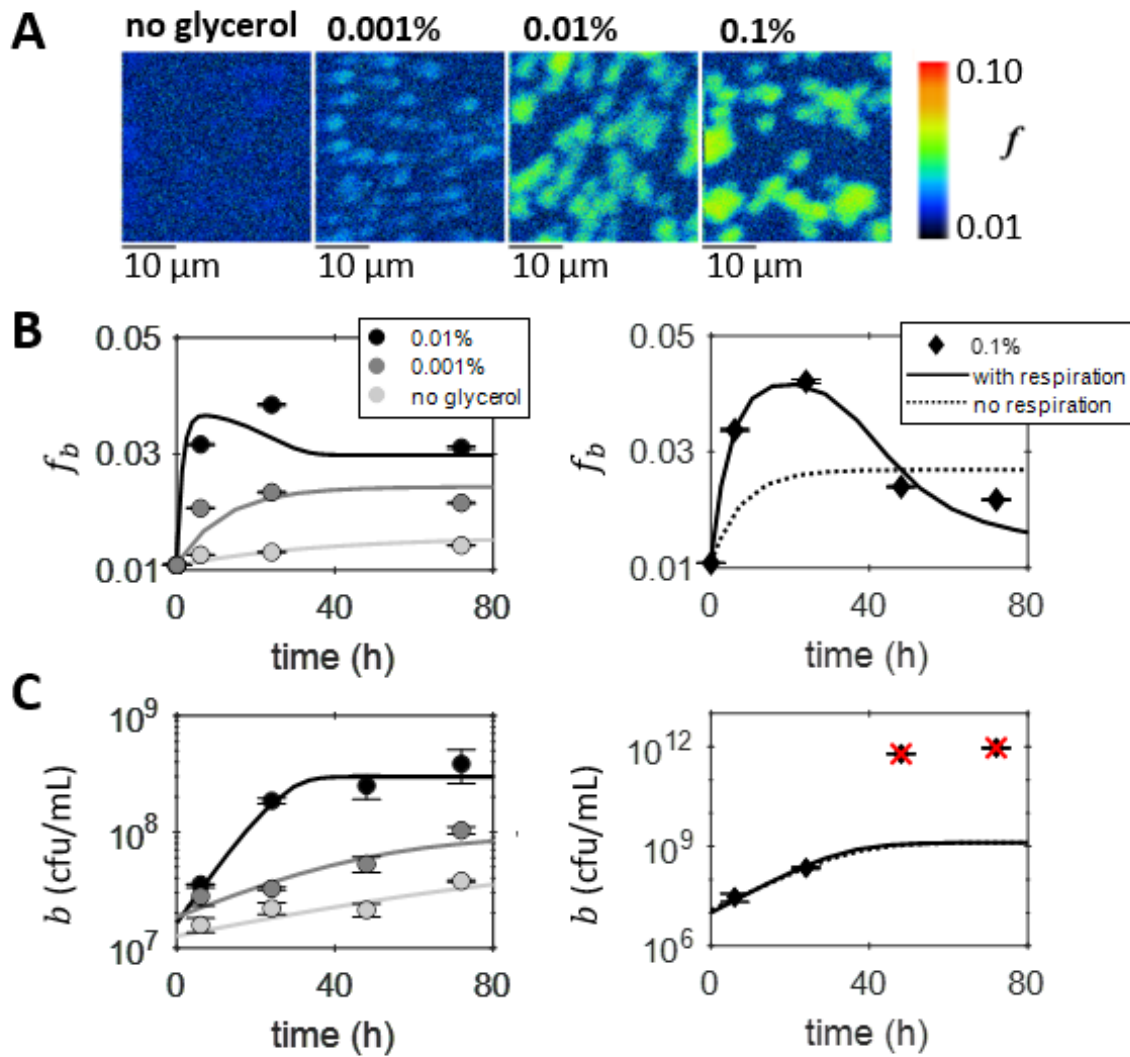

608

609 **Figure 2: Inorganic carbon acquisition by axenic bacteria.** (A) Example images of the atomic fraction

610 of  $^{13}\text{C}$ ,  $f$ , obtained by SIMS analysis of bacterial cells sampled after 24 h of axenic cultures grown

611 with different concentrations of unlabelled glycerol and 5 mM  $\text{NaH}^{13}\text{CO}_3$ . The colour map shows

612 the scale, starting at natural abundance. (B) The mean atomic fraction of  $^{13}\text{C}$ ,  $f_b$ , for the dilution-

613 corrected SIMS measurements (circles and diamonds) demonstrate inorganic carbon acquisition by

614 the bacteria. Error bars correspond to the standard errors. (C) Bacterial growth measured using

615 viable counts, plotted on a logarithmic scale as the mean (with standard error shown as error bars)

616 of two measurements (circles and diamonds), shows an increase in the exponential growth rate and

617 carrying capacity for a higher initial concentration of glycerol. The red crosses indicate the points

618 that were unexpectedly high (approximately  $1 \times 10^{12} \text{ cfu mL}^{-1}$ ) and therefore considered outliers  
619 and not included in the parameter optimisation. The results of the model fit, with parameters as  
620 specified in Supplementary Tables S6 and S7, are also plotted for the (B) atomic fraction  $f_b$  and (C)  
621 cell density  $b$ . For the 0.1 % glycerol culture the results from two different parameter optimisations  
622 are compared. For the fit that includes respiration (solid line), i.e.  $\eta$  included as a free parameter, the  
623 results are given in Supplementary Tables S6 and S7. For the fit that neglects bacterial respiration  
624 (dotted line), i.e.  $\eta' = 1$ , the parameter optimisation results are  $K_c = 6.6 \times 10^{-6} \text{ molC mL}^{-1}$ ,  $\mu_b =$   
625  $0.15 \text{ h}^{-1}$  and for the 0.1 % glycerol culture  $b(0) = 1.2 \times 10^7 \text{ cells mL}^{-1}$  and  $X = 0.025$ .

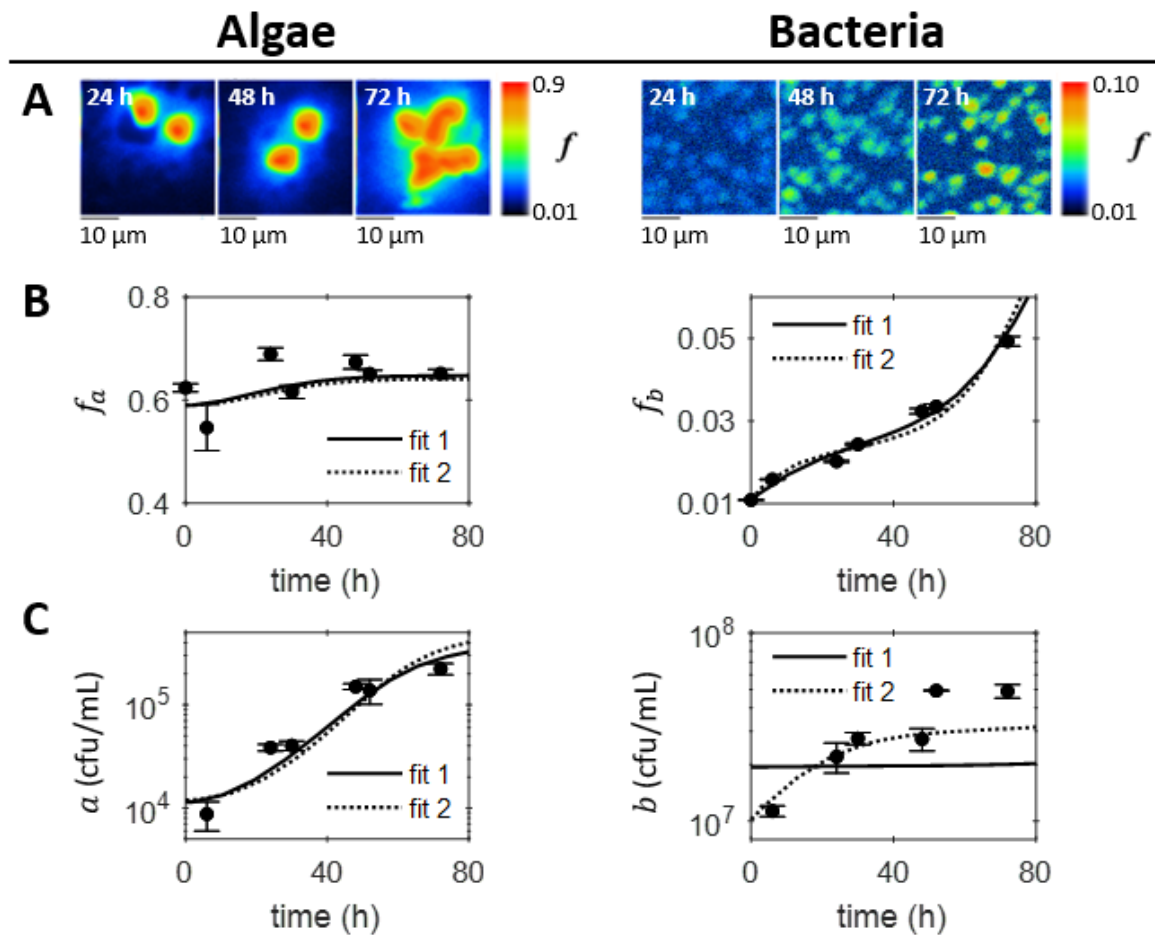

626

627 **Figure 3: The algal-bacterial co-culture.** (A) Example images of the atomic fraction of  $^{13}\text{C}$ ,  $f$ ,  
628 obtained by SIMS analysis of algal and bacterial cells sampled from the co-culture. The colour maps  
629 show the scale, starting at natural abundance. (B) The mean atomic fraction of  $^{13}\text{C}$ ,  $f_a$  and  $f_b$  for  
630 algae and bacteria respectively, calculated from the dilution-corrected SIMS measurements for at

631 least 5 algal cells and 100 bacterial cells per time-point (circles). Error bars correspond to the  
632 standard errors. (C) Algal and bacterial growth measured using viable counts, plotted as the mean  
633 (with standard error shown as error bars) of two viable count measurements (circles). The results of  
634 two model fits are also plotted for (B) the atomic fractions  $f_a$  and  $f_b$ , and (C) cell densities  $a$  and  $b$ .  
635 Fit 1 fixed the initial  $f_o(0) = 0.64$ , estimated using results for the pre-labelling culture of algae,  
636 whereas fit 2 included  $f_o(0)$  as a free parameter. The model parameter values and initial conditions  
637 are as specified in Supplementary Tables S6 and S8. Although fit 2 gives a better fit to the data, it  
638 gives a low initial atomic fraction for the DOC  $f_o(0)$  and high initial DOC concentration  $c_o(0)$ .

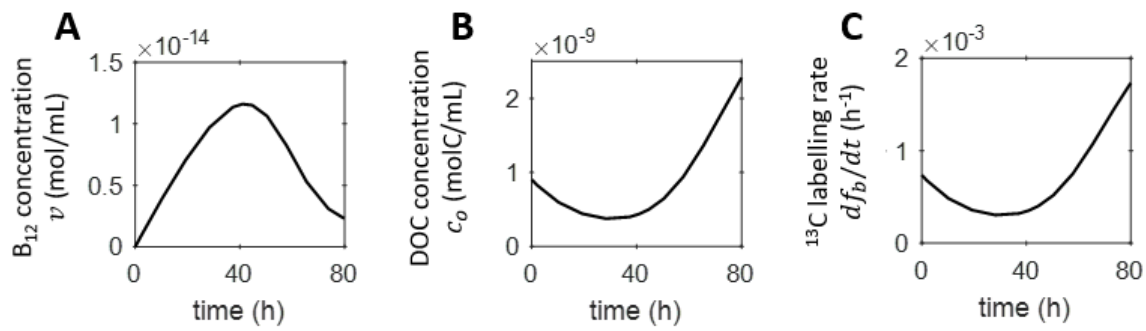

639  
640 **Figure 4: Nutrient kinetics in the co-culture predicted by the model.** The concentrations of (A) B<sub>12</sub>  
641 and (B) DOC in the co-culture predicted by the nutrient-explicit co-culture model using the  
642 parameter optimisation results obtained from fit 1, see Supplementary Table S6 for details of the  
643 parameter values and initial conditions used. (C) The isotope labelling rate calculated as  $\frac{df_b}{dt}$  given by  
644 equation (4).

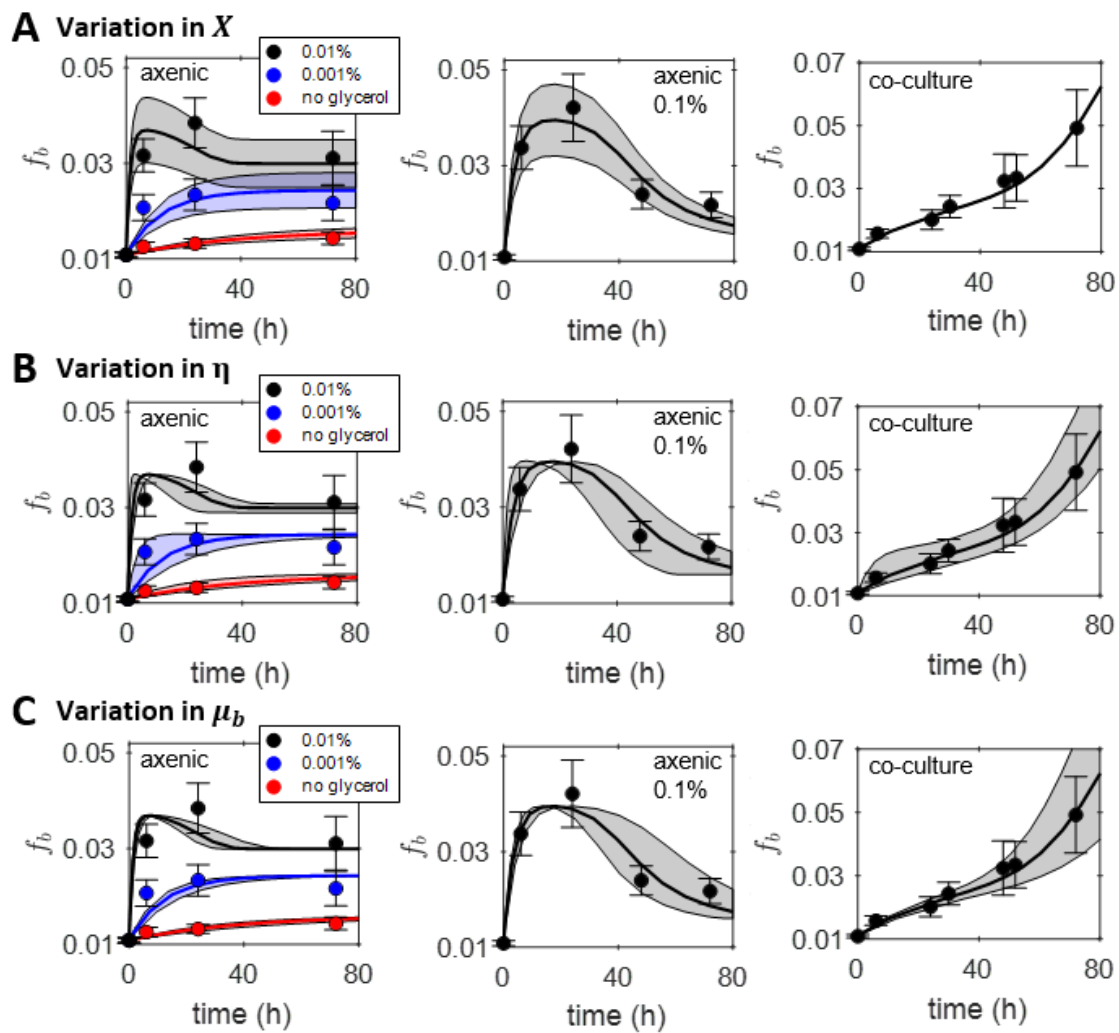

645

646 **Figure 5: Comparison of single cell heterogeneity predicted by the model and measured**

647 **experimentally with SIMS.** The mean for the dilution-corrected results for  $f_b$  obtained using SIMS

648 are plotted as circles with error bars indicating the standard deviation of the single cell values. The

649 results of the model fit to the experiments is shown as a solid line and the shaded regions indicate

650 the predicted range of  $f_b$  values when a range in a specific model parameter is considered. (A) The

651 range of  $X$  values considered for the 0.1 %, 0.01 %, 0.001 % and no glycerol cultures of axenic

652 bacteria were  $X \in [0.034, 0.058]$ ,  $X \in [0.031, 0.053]$ ,  $X \in [0.016, 0.028]$  and  $X \in [0.007, 0.011]$

653 respectively. For the co-culture the range considered was  $X \in [0.011, 0.019]$ . (B) The range of  $\eta$

654 values considered for the 0.1 %, 0.01 %, 0.001 % and no glycerol cultures of axenic bacteria were

655  $\eta \in [0.21, 0.81]$ ,  $\eta \in [0.05, 0.25]$ ,  $\eta \in [0.09, 0.69]$  and  $\eta \in [0.33, 0.93]$  respectively. For the co-

656 culture the range considered was  $\eta \in [0.11,0.91]$ . (C) For the axenic cultures of bacteria  $\mu_b \in$   
657  $[0.11,0.19]$  and for the co-culture  $\mu_b \in [0.34,0.50]$  in units  $h^{-1}$ . Variation in  $X$  best accounts for the  
658 observed temporal trends in the standard deviations of the single cell data for the axenic cultures,  
659 whereas variation in  $\mu_b$  best accounts for the co-culture results.
